# Supplementary material
Source: bioRxiv or medRxiv preprint supplement (https://medrxiv.org/highwire/filestream/83011/field_highwire_adjunct_files/0/2020.05.24.20111971-1.pdf)
Supplement: Supplementary file [file 2020.05.24.20111971-1.pdf]

## Appendix 1. Description of variables.

|                                                                                   |                                              |
|-----------------------------------------------------------------------------------|----------------------------------------------|
| <b>Demographic and epidemiological data</b>                                       | Chronic bronchitis                           |
| Date of birth                                                                     | Asthma                                       |
| Admission date                                                                    | Transient ischemic attack                    |
| Age (years)                                                                       | Hemiplegia or paraplegia                     |
| Gender                                                                            | Dementia                                     |
| Healthcare worker?                                                                | Peripheral arterial disease                  |
| Close contact with known case                                                     | Chronic liver disease                        |
| Nosocomial, nursing home, or community acquisition                                | Chronic kidney disease                       |
| Date of symptoms onset                                                            | Malignancy (solid, leukemia, lymphoma)       |
| Date of SARS-CoV-2 PCR testing                                                    | Diabetes with or without target organ damage |
| SARS-CoV-2 PCR test specimen (pharyngeal exudate, sputum, bronchoalveolar lavage) | Connective tissue disease                    |
| Alcohol use disorder                                                              | Gastric and/or duodenal ulcer                |
| Tobacco use                                                                       | AIDS                                         |
| Degree of dependency                                                              | Known HIV infection                          |
| <b>Comorbidity</b>                                                                | Obstructive sleep apnea-hypopnea syndrome    |
| Hypertension                                                                      | Charlson comorbidity index score             |
| Dyslipidemia                                                                      | <b>Habitual treatment</b>                    |
| Atrial fibrillation                                                               | Metformin                                    |
| Anxiety disorder                                                                  | DPP-4 inhibitors                             |
| Depression                                                                        | GLP-1RA                                      |
| Obesity                                                                           | SGLT2 inhibitors                             |
| Neurodegenerative disease                                                         | Insulin                                      |
| Organ transplant                                                                  | Inhaled corticosteroids                      |
| Myocardial infarction                                                             | ACE inhibitors                               |
| Angina pectoris                                                                   | Angiotensin-renin blockers                   |
| Heart failure                                                                     | Aspirin                                      |
| Chronic obstructive pulmonary disease                                             | Anticoagulants                               |
|                                                                                   | Biological therapies                         |

Hydroxychloroquine

Immunosuppressors

**Symptoms and physical findings at admission**

Cough

Myalgia

Ageusia

Anosmia

Fatigue

Anorexia

Sore throat

Headache

Fever

Shortness of breath

Diarrhea

Vomiting

Abdominal pain

Tachypnea

Systolic and diastolic blood pressure

Heart rate

Pulmonary auscultation findings

**Laboratory test and diagnostic imaging test findings at admission and at 7 days after admission (or at discharge or at ICU admission)**

Oxygen saturation (pulse-oximetry) and FiO<sub>2</sub>

**Complete blood count**

Hemoglobin

White blood cell total count

White blood cell differential count

Platelet total count

**Biochemical panel**

Lactate dehydrogenase

Aspartate aminotransferase

Alanine aminotransferase

Sodium

Potassium

Basal blood glucose level

Ferritin

Venous lactate

Troponin I

Troponin T

Interleukin-6

Prothrombin time and ratio

Activated partial thromboplastin time

D-dimer

Procalcitonin

**Blood gases**

pH

PO<sub>2</sub>

PCO<sub>2</sub>

PO<sub>2</sub>/FIO<sub>2</sub>

**Diagnostic imaging tests**

Chest x-ray results

Chest CT scan results

Point-of-care lung ultrasound

Microbiological tests

Influenza PCR test

Legionella and pneumococcal urinary antigen tests

HIV antibody screening

**Treatment during hospitalization (start and end date and doses, when required)**

Lopinavir/ritonavir

Interferon beta-1B  
Remdesivir  
Hydroxychloroquine  
Chloroquine  
Tocilizumab  
Baricitinib  
Systemic corticosteroids  
Beta-lactam antibiotics  
Macrolide antibiotics  
Quinolone antibiotics  
Oseltamivir  
Inhaled beclomethasone  
ACE inhibitors  
Angiotensin-renin blockers  
Oral anticoagulants  
Low-molecular-weight heparin  
Aspirin  
Non-steroidal anti-inflammatory drugs  
Ventilation therapy  
Prone position  
Non-invasive mechanical ventilation  
Invasive mechanical ventilation  
High flow nasal cannula

## **Complications**

Bacterial pneumonia  
Acute respiratory distress syndrome  
Heart failure  
Cardiac arrhythmia  
Myocardial infarction  
Myocarditis  
Seizures  
Stroke  
Shock  
Acute kidney injury  
Sepsis  
Disseminated intravascular coagulation  
Venous thromboembolism  
Multiple organ dysfunction syndrome  
Acute peripheral artery disease

## **Data on outcomes**

Intensive care unit admission  
Cause and date of discharge  
Readmission  
Cause and date of discharge after readmission  
Death and date of death
